# Supplementary material for: Reduced OPA1, Mitochondrial Fragmentation and Increased Susceptibility to Apoptosis in Granular Corneal Dystrophy Type 2 Corneal Fibroblasts
Source: Genes (Basel). 2023 Feb 24;14(3):566. doi: 10.3390/genes14030566 (PMC10048436; doi:10.3390/genes14030566)
Supplement: Supplementary file 1 [file genes-14-00566-s001.zip › genes-2193969-supplementary.pdf]

# Supplementary Materials

**Supplementary Table S1. Antibodies used in this study**

| Antibodies                           | Provider                                    | Catalog Number | Experiment | Results (Figure)    |
|--------------------------------------|---------------------------------------------|----------------|------------|---------------------|
| Anti-OPA1                            | BD Transduction Laboratoris, Inc. USA       | 612606         | WB*        | Figure 1, 3,4 Sup.1 |
| Anti-MFN1                            | NOVUS Biological, Littleton, CO             | NBP1-71775     | WB         | Figure 1, 3 Sup.1   |
| Anti-MFN2                            | Abcam                                       | Ab 56889       | WB         | Figure 1, 3 Sup.1   |
| Anti-pDRP1                           | Cell Signaling, Beverly, MA                 | #4867          | WB         | Figure 1, 3 Sup.1   |
| Anti-DRP1                            | Cell Signaling, Beverly, MA                 | #8570          | WB         | Figure 1, 3 Sup.1   |
| Anti-FIS1                            | IMGENEX, San Diego, CA                      | IMG5113A       | WB         | Figure 1, 3 Sup.1   |
| Anti-TGFB1p                          | R&D Systems, Minneapolis, MN, USA.          | AF2935         | WB         | Figure1             |
| Anti-PARP1                           | Cell Signaling Technology Beverly, MA, USA. | #9532S         | WB         | Figure 4            |
| Anti- Cleaved PARP1                  | Cell Signaling Technology Beverly, MA, USA. | #3868S         | WB         | Figure 4            |
| Anti-Caspase 3                       | Cell Signaling Technology Beverly, MA, USA. | #9662S         | WB         | Figure 4            |
| Anti-Cleaved Caspase 3               | Cell Signaling Technology Beverly, MA, USA. | #9661S         | WB         | Figure 4            |
| Total OXPHOS complexes detection kit | Mitosciences Inc., Eugene, OR.              | MS601          | WB         | Figure 5            |
| Anti-NRF1                            | Cell Signaling Technology Beverly, MA, USA. | #8882          | WB         | Figure 6            |
| Anti-NRF2                            | Abcam                                       | Ab56889        | WB         | Figure 6            |
| Anti-PGC1 $\alpha$                   | Cell Signaling Technology Beverly, MA, USA. | #2178          | WB         | Figure 6            |
| Anti-DLP1                            | BD Transduction Laboratoris, Inc. USA       | 611112         | WB         | Sup.1               |
| Anti-GAPDH                           | Merck Millipore, Billerica, MA, USA.        | MAB374         | WB         | Figure 3 Sup.1      |
| Anti-TOM20                           | Santa Cruz, CA, USA                         | SC11415        | WB         | Figure 5,6 Sup.1    |
| Anti-TIM23                           | Abcam                                       | Ab116329       | WB         | Figure 6            |
| Anti-Histone H3                      | Calbiochem, San Diego, CA, USA.             | Ab1791         | WB         | Figure 6            |
| Anti- $\beta$ -actin                 | Sigma-Aldrich, St. Louis, MO, USA.          | A5441          | WB         | Figure 1,4 Sup.1    |
| Anti-mouse IgG                       | Thermo Fisher Scientific                    | NCI1430        | WB         |                     |
| Anti-rabbit IgG                      | Thermo Fisher Scientific                    | NCI1460        | WB         |                     |

WB\*: Western blots  
Sup: Supplementary data

**Supplementary Table S2. Materials used in this study**

| Name                                                                      | Provider                            | Catalog Number | Experiments                  | Results (Figure) |
|---------------------------------------------------------------------------|-------------------------------------|----------------|------------------------------|------------------|
| Carbonyl cyanide m-chlorophenylhydrazone (CCCP)                           | Sigma-Aldrich, St. Louis, MO, USA.  | C2759          | Mitochondrial toxicity assay | Figure 7,4       |
| Mdivi-1 (3-(2,4-dichloro-5-methoxyphenyl)-2-sulfanyl-4(3H)-quinazolinone) | Sigma-Aldrich, St. Louis, MO, USA.  | M0199          | Mitochondrial toxicity assay | Figure 7         |
| OPA1 shRNA (h) Lentiviral Particles                                       | Santa Cruz, CA, USA                 | sc-106808-V    | OPA1 gene knockdown          | Figure 3, 4      |
| Dulbecco's Modified Eagle's Medium (DMEM)                                 | Corning Inc., Corning, NY, USA      | 10-013-CV      | Cell culture                 |                  |
| Fetal Bovine Serum                                                        | Corning Inc., Corning, NY, USA      | 35-015-CV      | Cell culture                 |                  |
| Presto Blue                                                               | Invitrogen, Life Technologies, USA. | A13261         | Cell proliferation assay     | Figure 4         |
| MitoTraker Red FM                                                         | Thermo Fisher Scientific            | M22425         | Mitochondrial staining       | Figure 1         |
| MitoTraker Green FM                                                       | Thermo Fisher Scientific            | M7514          | Mitochondrial staining       | Figure 1         |

Suppl: Supplementary data

## **2. SUPPLEMENTARY METHODS**

### **Supplementary method 1. Cell Viability Assay**

In brief, corneal fibroblasts ( $5 \times 10^3$  cells/well) were plated into 96-well plates (Corning, Inc., Corning, NY) and incubated overnight. They were treated with different concentrations of CCCP, either alone or in combination with Mdivi-1, and incubated for 15 h. The Presto Blue reagent was added to the wells and the plates were incubated for 4 h, after which fluorescence was measured (540 nm excitation/590 nm emission). These experiments were performed in triplicates and data are expressed as mean  $\pm$  SD. Student's t-test was used to determine statistical significance (\* $p < 0.05$  and \*\* $p < 0.01$  compared to control).

### **Supplementary method 2. Preparation of Cell Lysates and Western Blot Analysis**

The supernatant was used to determine the total protein concentration using a bicinchoninic acid kit (Pierce). Total cellular proteins ( $\sim 50$   $\mu$ g) were electrophoresed in NuPAGE™ 4-12 % Bis-Tris Protein Gels (Invitrogen: NP0335). Proteins were transferred to polyvinylidene difluoride membranes with the iBlot 2 Dry Blotting System (Thermo Fisher Scientific), blocked in 5 % dry milk in Tris-buffered saline containing Tween 20 (TBS-T; 0.02 mol/L Tris, 0.15 mol/L NaCl, pH 7.5, containing 0.1 % Tween 20) at room temperature for 1 hour, washed three times with TBS-T, and then incubated with primary antibodies (supplementary table 1) at 4°C overnight. After washing three times with TBS-T, the blots were incubated with secondary antibodies conjugated with horseradish peroxidase at room temperature for 1 h. Immunoreactive band intensities were quantified using a computer software (ImageJ software, version 1.37, Wayne Rasband, NIH), corrected by background subtraction, and normalized to the intensity of the corresponding  $\beta$ -actin or GAPDH (glyceraldehyde-3-phosphate dehydrogenase) protein bands.

### **Supplementary method 3. Quantification of mtDNA Copy Number and Deletion**

Copy numbers of mtDNA or nuclear DNA (nDNA) were calculated from the threshold cycle and

standard curve. mtDNA deletion was assayed as described previously.<sup>1</sup> To screen the 4,977 base pair (bp) deletion in mtDNA, we used the DNA samples extracted from the cells as templates and two pairs of primers, as described previously.<sup>1</sup> The PCR products were electrophoresed on a 1.2% agarose gel. The deletion was indicated by the appearance of a 358-bp band. The mtDNA of WT cells was used as the control and yielded no or little PCR products under such conditions because of the large flanking region (>5 kb).<sup>1</sup> Relative amounts of mtDNA and nDNA copy numbers were compared. The ddCt (mtDNA to 18S) represents the mtDNA copy number in a cell.

#### **Supplementary method 4. Mitochondrial Network Imaging by Fluorescence and Electron Microscopy**

Briefly, cells were incubated these dyes and fluorescence was visualized using a Nikon Eclipse E800 microscope with a fluorescein filter and a water immersion objective (60×). All images were captured with equal exposure times. Fluorescent images were quantified for each sample by averaging the mean intensity fluorescence of 5 random cells in 3 different fields using Nikon Nis Elements software. Conventional transmission electron microscopic (EM) analysis was performed as described previously.<sup>2</sup> Briefly, cultured corneal fibroblasts were fixed with overnight, dehydrated, processed, and evaluated under a transmission electron microscope (JEM1200 EX2; JEOL Ltd., Tokyo, Japan).

A

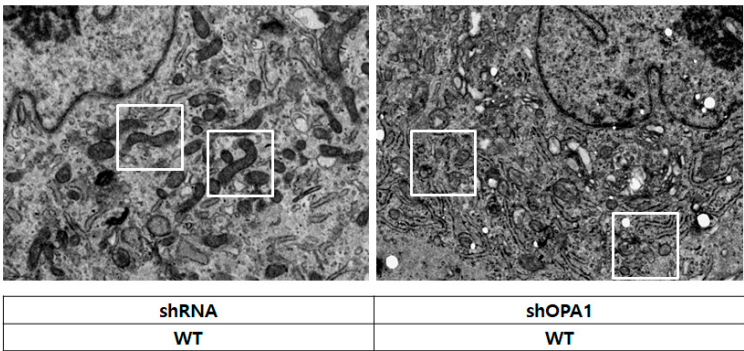

B

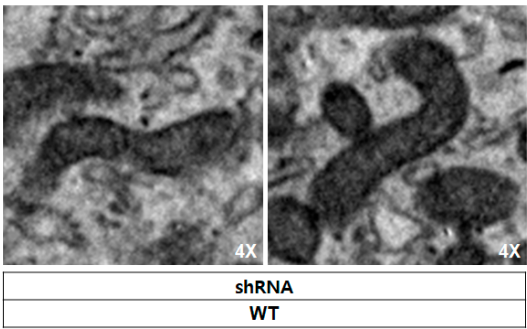

C

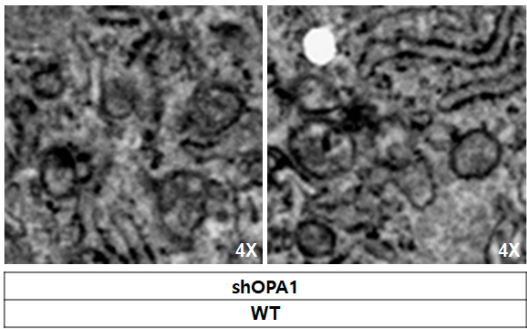

Figure S1: Mitochondrial ultrastructural abnormalities in scrambled shRNA and OPA1-specific shRNA-expressing in corneal fibroblasts.

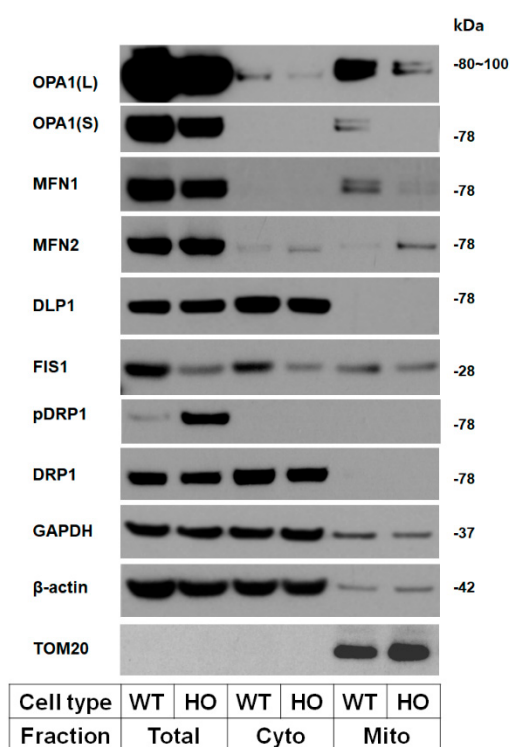

**Figure S2: Mitochondrial fusion/fission-related protein levels in total, cytosol, and mitochondrial fraction of WT and GCD2 HO corneal fibroblasts.**

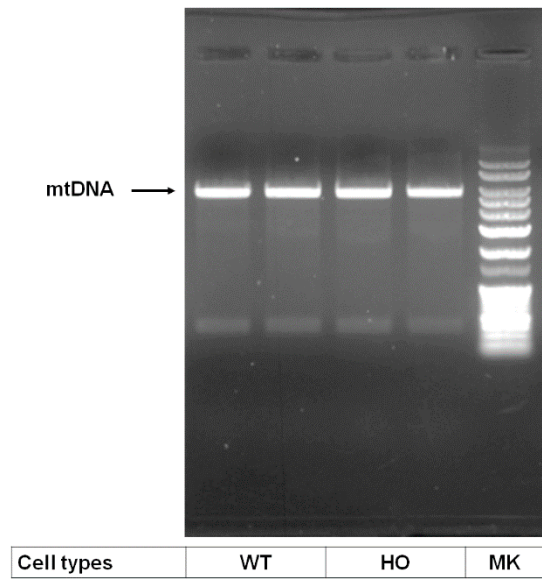

**Figure S3. Detection of the Mitochondrial DNA Deletion.**

## References

1. Malik, A.N.; Shahni, R.; Rodriguez-de-Ledesma, A.; Laftah, A.; Cunningham, P. Mitochondrial DNA as a non-invasive biomarker: Accurate quantification using real time quantitative PCR without co-amplification of pseudogenes and dilution bias. *Biochem. Biophys Res. Commun.* **2011**, *412*, 1–7. <https://doi.org/10.1016/j.bbrc.2011.06.067>.
2. Kim TI, Kim H, Lee DJ, Choi SI, Kang SW, Kim EK. Altered mitochondrial function in type 2 granular corneal dystrophy. *The American journal of pathology.* 2011;179:684-692.
